# Supplementary material for: Second-generation lung-on-a-chip with an array of stretchable alveoli made with a biological membrane
Source: PubMed Central journal article supplement (PMC7864995; doi:10.1038/s42003-021-01695-0), 2021-02-05
Supplement: 42003_2021_1695_MOESM3_ESM.pdf [file 42003_2021_1695_MOESM3_ESM.pdf]

## **Description of Additional Supplementary Files**

**File name:** Supplementary Movie 1

**Description:** 3D deflection of human primary cells on the CE-membrane.

**File name:** Supplementary Data 1

**Description:** The source data underlying figures.
